# Supplementary material for: Crystalline/amorphous composite interface of CoP@Ni/Fe–P as a boosted electrocatalyst for full water splitting
Source: Royal Society of Chemistry journal article supplement (doi:10.1039/d3dt01745a), 2023-01-01
Supplement: d3dt01745a1.pdf [file d3dt01745a1.pdf]

## **Crystalline/amorphous composite interface of CoP@Ni/Fe-P as boosted electrocatalyst for full water splitting**

Lijuan Yu <sup>a</sup>, Peilin Wu <sup>a</sup>, Tenghui Tian <sup>a</sup>, Xingquan He <sup>a</sup>, Meihong Fan <sup>a</sup>, Lili Cui\* <sup>a</sup>

a. School of Chemistry and Environmental Engineering, Changchun University of Science and Technology, Changchun 130022, P.R. China

### **Materials characterization**

Scanning electron microscopy (SEM) was performed on JSM-6701F (JEOL) scanning electron microscope with the accelerating voltage 10 kV. Samples were prepared by directly sticking on the conductive tape.

Transmission electron microscopy (TEM) was carried out by JEM-2100F (JEOL) microscope working at an accelerating voltage from 120 kV to 200 kV. The CC supporting samples were treated in ethanol by ultrasonicating treatment for 15 min and then the dispersion was dropped onto carbon-coated copper grids and drying at ambient temperature.

The XRD analysis carried out with a scanning rate of 5° min<sup>-1</sup> in the 2θ range 10-80° using the Rigaku Ultima VI X-ray diffractometer (XRD) with Cu Kα radiation (λ = 1.543 Å) at 40 kV and 20 mA. The CC supporting samples were tested directly.

The X-ray photoelectron spectroscopy (XPS) was performed using an ESCALAB 250 (Thermo Scientific Corporation) X-ray photoelectron spectrometer working with a monochromated X-ray source (Al Kα hν¼ 1486.6 eV). The CC supporting samples

---

\*E-mail: cuilili@cust.edu.cn

were tested directly.

### **Electrochemical measurements**

Electrochemical measurements were performed on a three-electrode electrochemical workstation (CHI 760E) using Hg/HgO electrode, graphite rod and the prepared samples as the reference electrodes, counter electrodes and working electrodes, respectively. The reference electrode was corrected according to the following reversible hydrogen electrode (RHE) equation:  $E(\text{RHE}) = E(\text{Hg}/\text{HgO}) + 0.0592 \times \text{pH} + 0.098$ .  $\text{N}_2$ -saturated 1 M KOH was used as alkaline electrolyte for HER and OER measurements. Cyclic voltammograms (CV) cycles were performed at a scan rate of 100 mV/s. Linear scan voltammograms (LSV) were recorded at a scan rate of 1 mV/s. EIS plots were obtained at potential of -1.5 V from 100 kHz to 0.1 Hz with a 5 mV AC dither in 1 M KOH.  $C_{dl}$  was measured using CV method in the non-Faradaic current region (-0.1-0 V vs. RHE) at scan rate of 30, 50, 70, 100, 150, 200 mV/s.

### **Determination of number of M sites involved in OER based on redox peak method<sup>1</sup>**

Area under MOOH formation peak for Ni/Fe-P =  $4.296 \times 10^{-5} \text{ A V}$

Charge associated with MOOH formation =  $4.296 \times 10^{-5} \text{ A V} / 0.005 \text{ V s}^{-1}$

$$= 8.59 \times 10^{-3} \text{ A s}$$

$$= 8.59 \times 10^{-3} \text{ C}$$

Charge of an electron =  $1.602 \times 10^{-19} \text{ C}$

Hence,

$$\begin{aligned}\text{Number of electrons transferred} &= 8.59 \times 10^{-3} \text{ C} / 1.602 \times 10^{-19} \text{ C} \\ &= 5.36 \times 10^{16}\end{aligned}$$

$$\text{Area under MOOH formation peak for CoP} = 3.358 \times 10^{-5} \text{ A V}$$

$$\begin{aligned}\text{Charge associated with MOOH formation} &= 3.358 \times 10^{-5} \text{ A V} / 0.005 \text{ V s}^{-1} \\ &= 6.72 \times 10^{-3} \text{ A s} \\ &= 6.72 \times 10^{-3} \text{ C}\end{aligned}$$

$$\text{Charge of an electron} = 1.602 \times 10^{-19} \text{ C}$$

Hence,

$$\begin{aligned}\text{Number of electrons transferred} &= 6.72 \times 10^{-3} \text{ C} / 1.602 \times 10^{-19} \text{ C} \\ &= 4.19 \times 10^{16}\end{aligned}$$

$$\text{Area under MOOH formation peak for CoP@Ni/Fe-P} = 1.432 \times 10^{-4} \text{ A V}$$

$$\begin{aligned}\text{Charge associated with MOOH formation} &= 1.432 \times 10^{-4} \text{ A V} / 0.005 \text{ V s}^{-1} \\ &= 2.86 \times 10^{-2} \text{ A s} \\ &= 2.86 \times 10^{-2} \text{ C}\end{aligned}$$

$$\text{Charge of an electron} = 1.602 \times 10^{-19} \text{ C}$$

Hence,

$$\begin{aligned}\text{Number of electrons transferred} &= 2.86 \times 10^{-2} \text{ C} / 1.602 \times 10^{-19} \text{ C} \\ &= 1.78 \times 10^{17}\end{aligned}$$

Since, the  $M^{2+}$  to  $M^{3+}$  formation reaction is a single electron transfer reaction, the number of electron transferred during the reaction is exactly equal to the number of M sites involved in the reaction.

Hence,

Number of M sites that actually involved in OER for Ni/Fe-P =  $5.36 \times 10^{16}$

Number of M sites that actually involved in OER for CoP =  $4.19 \times 10^{16}$

Number of M sites that actually involved in OER for CoP@Ni/Fe-P =  $1.78 \times 10^{17}$

Determination of Turnover Frequency (TOF) from OER Current Density TOF in our study was calculated assuming that the surface-active M atoms that had undergone the redox reaction just before onset of OER only participated in OER electrocatalysis. The corresponding expression is,

$$\text{TOF} = I \times N_A / (F \times n \times \tau)$$

Where, I = current,  $N_A$  = Avogadro number, F = Faraday constant, n = Number of electrons and  $\tau$  = Surface concentration.

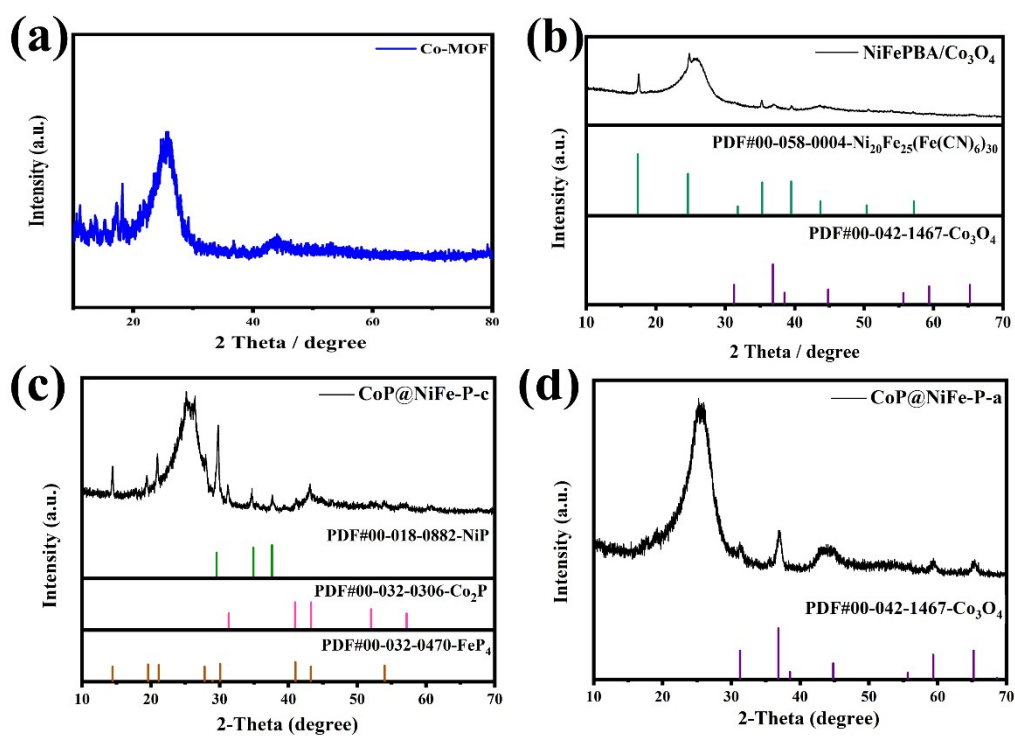

**Figure S1.** XRD patterns of Co-MOF/CC (a), Co<sub>3</sub>O<sub>4</sub>@PBA/CC (b), CoP@Ni/Fe-P-c (c) and CoP@Ni/Fe-P-a (d).

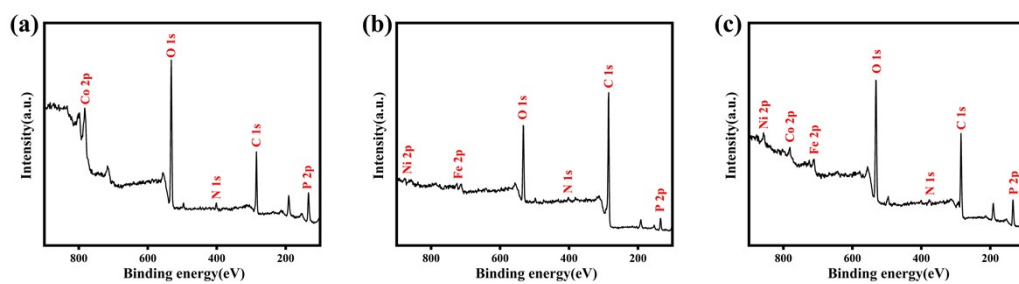

**Figure S2.** XPS survey spectra of Ni/Fe-P/CC (a), CoP/CC (b) and CoP@Ni/Fe-P/CC (c).

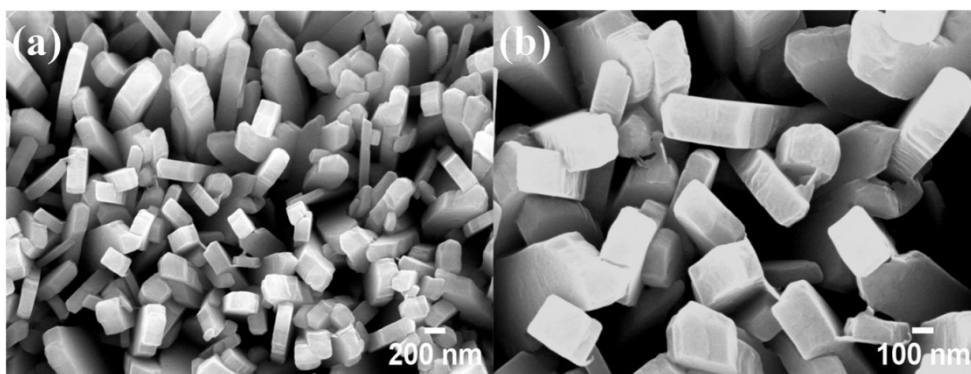

**Figure S3.** SEM images of Co-MOF/CC precursor.

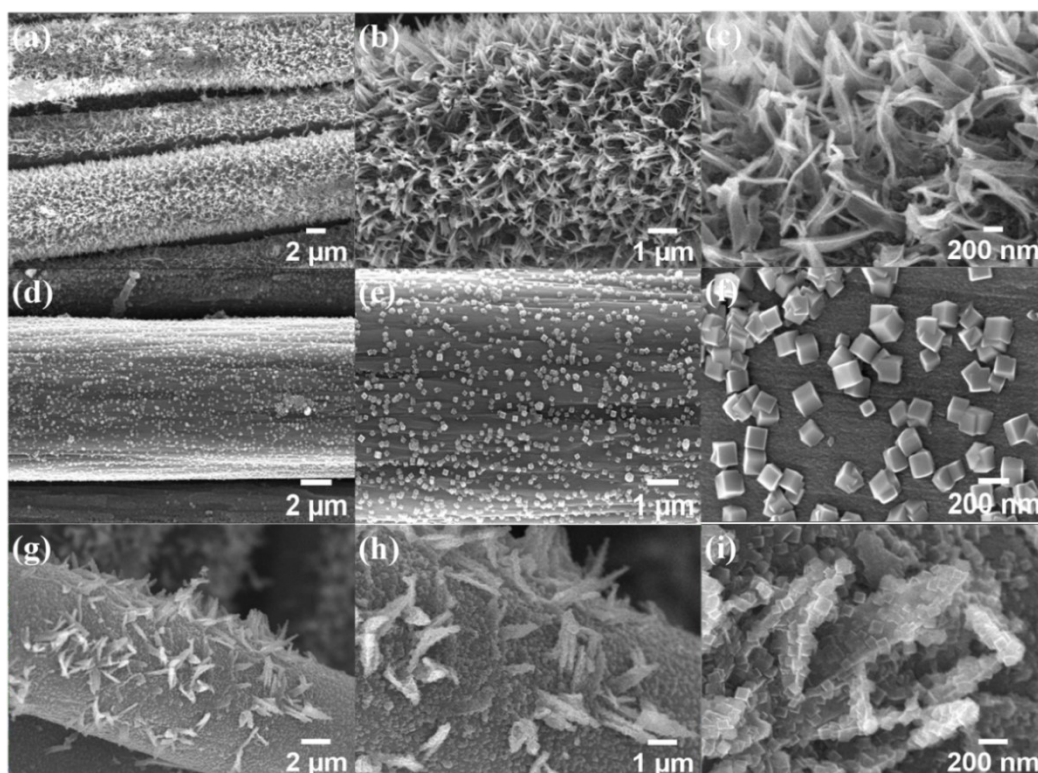

**Figure S4.** SEM images with different magnification of Co<sub>3</sub>O<sub>4</sub> (a-c), NiFePBA (d-f) and Co<sub>3</sub>O<sub>4</sub>@NiFePBA (g-i).

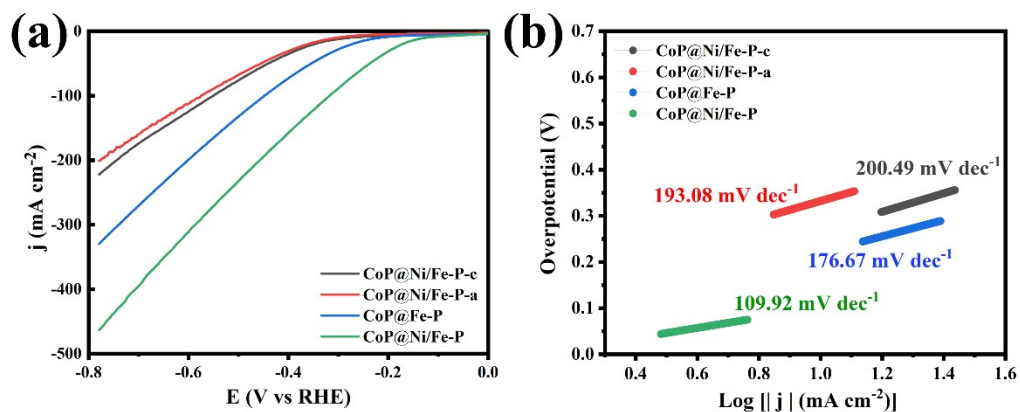

**Figure S5.** HER polarization curves (a) and the corresponding Tafel slope (b) of CoP@Ni/Fe-P/CC, CoP@Ni/Fe-P-a/CC, CoP@Ni/Fe-P-c/CC and CoP@Fe-P/CC.

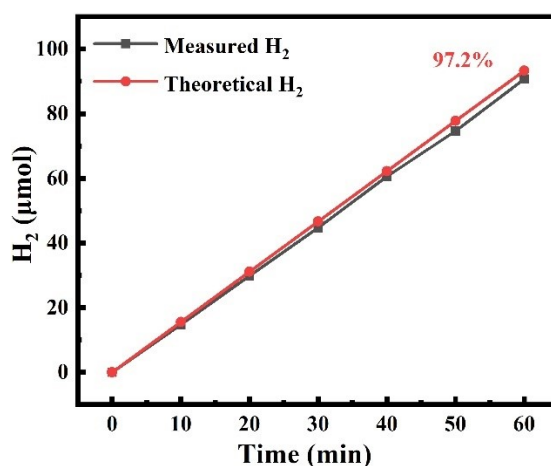

**Figure S6.** The amount of H<sub>2</sub> evolved from the CoP@Ni/Fe-P/CC electrode at a constant current density of 20 mA cm<sup>-2</sup> and the corresponding FE.

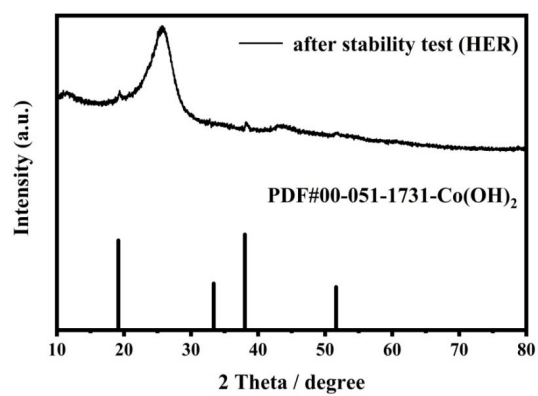

**Figure S7.** XRD patterns of CoP@Ni/Fe-P/CC after HER stability test.

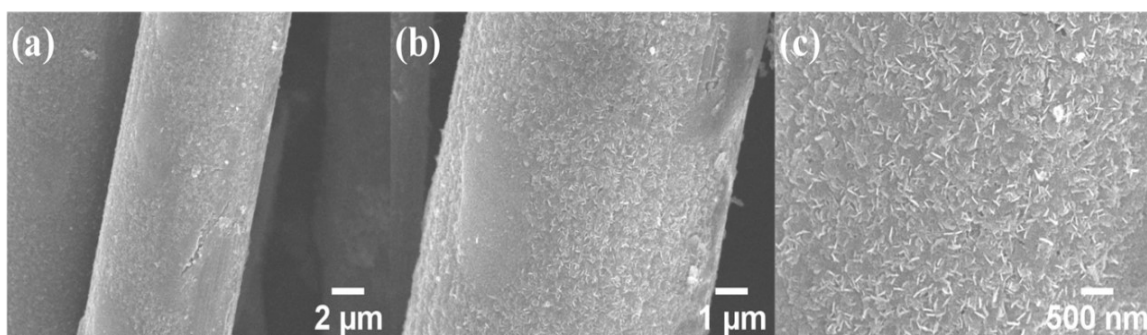

**Figure S8.** SEM images of CoP/Ni/Fe-P/CC after HER stability test.



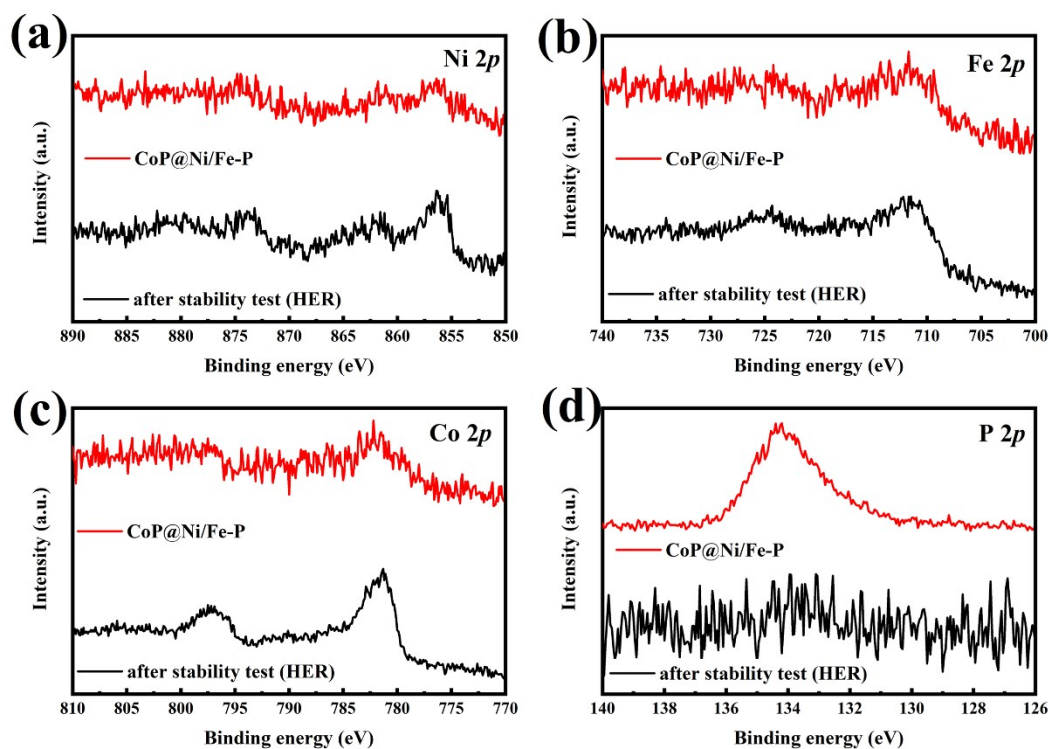

**Figure S9.** XPS spectrums for different elements after HER stability test.

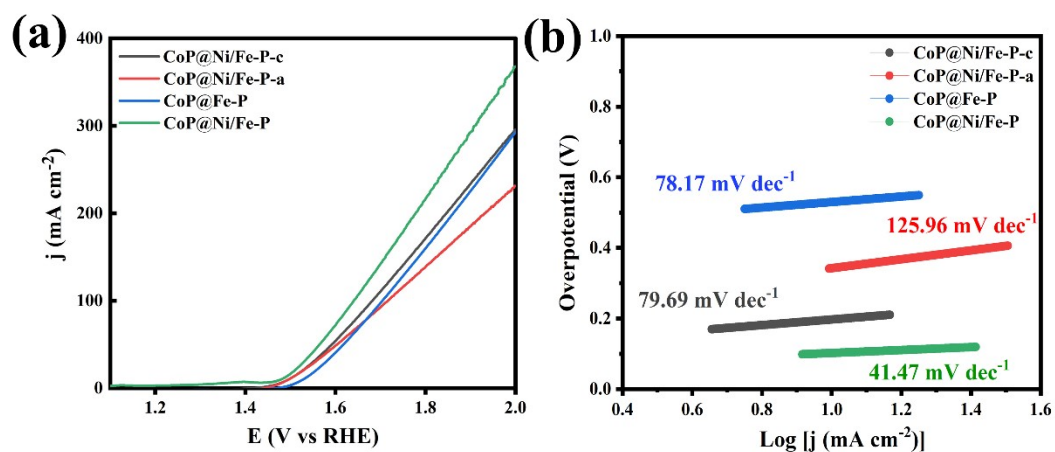

**Figure S10.** OER polarization curves (a) and the corresponding Tafel slope (b) of CoP@Ni/Fe-P/CC, CoP@Ni/Fe-P-a/CC, CoP@Ni/Fe-P-c/CC and CoP@Fe-P/CC.

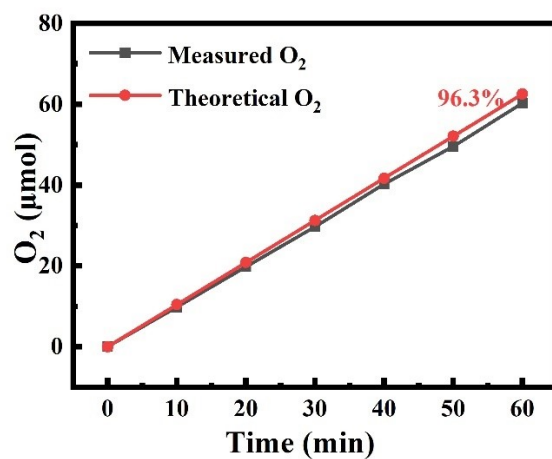

**Figure S11.** The amount of O<sub>2</sub> evolved from the CoP@Ni/Fe-P/CC electrode at a constant current density of 80 mA cm<sup>-2</sup> and the corresponding FE.

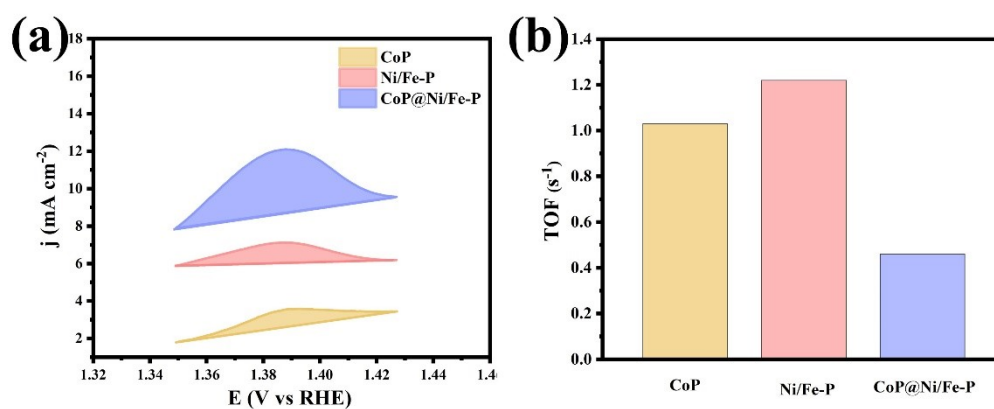

**Figure S12.** The MOOH formation peak from LSVs used for area integration (a) and TOF value (b) for Ni/Fe-P/CC, CoP/CC and CoP@Ni/Fe-P/CC.

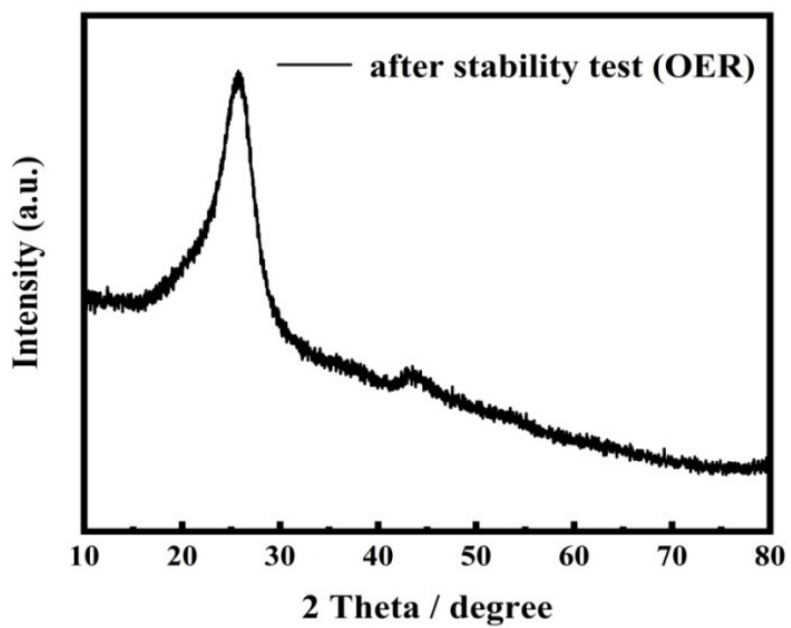

**Figure S13.** XRD pattern for CoP@Ni/Fe-P/CC after OER stability test.

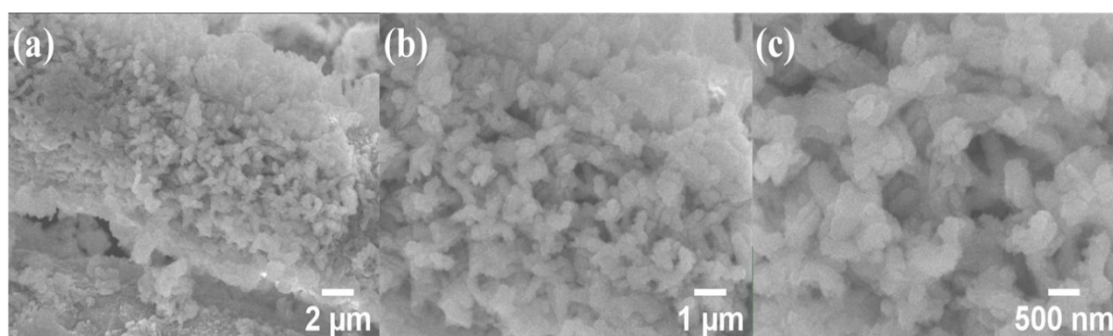

**Figure S14.** SEM images of CoP@Ni/Fe-P/CC after OER stability test.

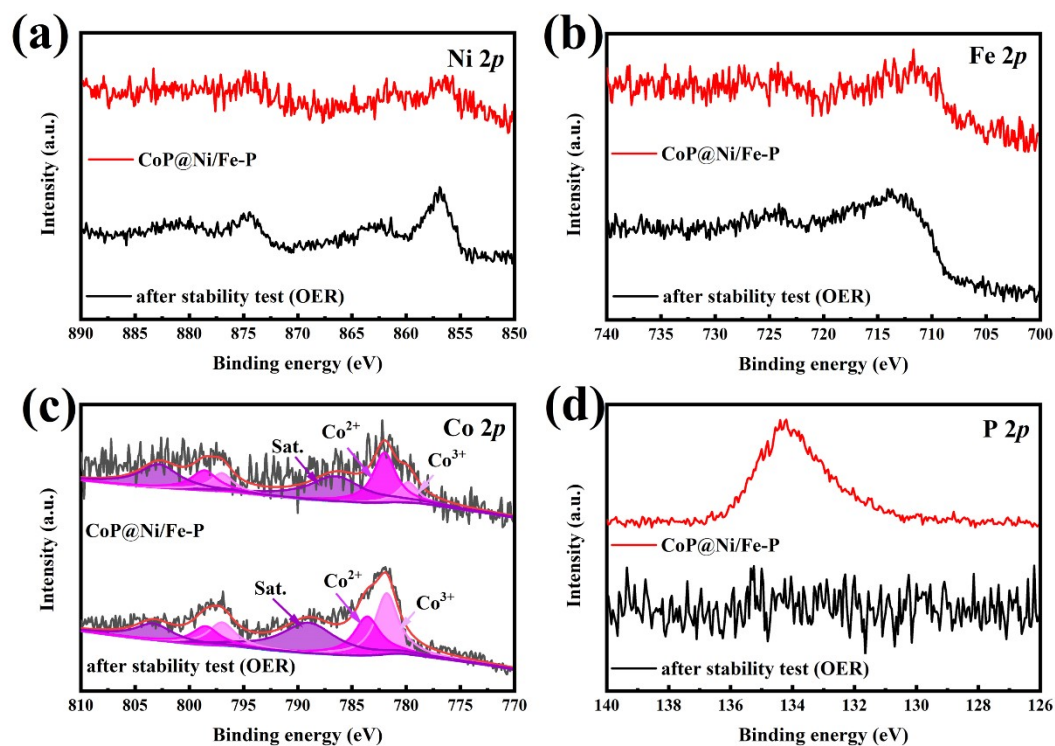

**Figure S15.** XPS spectra for different elements of CoP@Ni/Fe-P/CC after OER stability test.

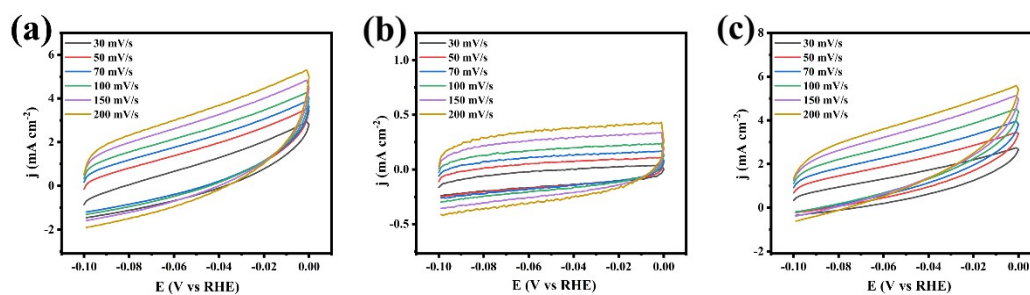

**Figure S16.** Cyclic voltammety curves of Ni/Fe-P/CC (a), CoP/CC (b) and CoP@Ni/Fe-P/CC with a different applied scan rate value for obtaining the  $C_{dl}$  information.

Table S1. The elements content for different electrocatalysts.

| Sample                                 | Ni   | Fe   | Co   | P     | C     | O     | N     |
|----------------------------------------|------|------|------|-------|-------|-------|-------|
| CoP                                    | /    | /    | 6.80 | 19.25 | 27.50 | 40.79 | 5.66  |
| Ni/Fe-P                                | 1.16 | 1.65 | /    | 7.05  | 65.89 | 19.53 | 4.73  |
| CoP@Ni/Fe-P                            | 2.24 | 2.68 | 4.69 | 13.93 | 45.97 | 25.81 | 4.68  |
| NiFePBA/Co <sub>3</sub> O <sub>4</sub> | 2.88 | 3.01 | 3.74 | /     | 60.07 | 13.40 | 16.90 |
| after I-t test (HER)                   | 1.97 | 2.25 | 8.43 | 4.63  | 45.94 | 32.70 | 4.08  |
| after I-t test (OER)                   | 1.57 | 2.82 | 5.31 | 2.78  | 45.60 | 37.80 | 4.12  |

Table S2. Electrocatalytic parameters for HER performance of the CoP@Ni/Fe-P and as-prepared contrast electrocatalysts in 1 M KOH electrolyte.

| Catalyst      | Current density<br>[mA cm <sup>-2</sup> ] | Overpotential<br>[mV] | Tafel slope<br>[mV dec <sup>-1</sup> ] |
|---------------|-------------------------------------------|-----------------------|----------------------------------------|
| CoP           | 10/50/100                                 | 137/265/375           | 150.27                                 |
| Ni/Fe-P       | 10/50/100                                 | 240/430/535           | 257.35                                 |
| CoP@Ni/Fe-P   | 10/50/100                                 | 125/237/318           | 109.92                                 |
| Pt/C          | 10/50/100                                 | 33/146/262            | 44.28                                  |
| CoP@Fe-P      | 10/50/100                                 | 218/355/448           | 176.67                                 |
| CoP@Ni/Fe-P-c | 10/50/100                                 | 277/441/551           | 200.49                                 |
| CoP@Ni/Fe-P-a | 10/50/100                                 | 303/456/575           | 193.08                                 |

Table S3. Electrocatalytic parameters for HER performance of the CoP@ Ni/Fe-P and previously reported electrocatalysts in 1 M KOH electrolyte.

| Catalyst                                                            | Substrate | Current density<br>$j$ (mA cm <sup>-2</sup> ) | Overpotential at corresponding<br>$E$ (mV) | Tafel slope<br>(mV dec <sup>-1</sup> ) | Ref.      |
|---------------------------------------------------------------------|-----------|-----------------------------------------------|--------------------------------------------|----------------------------------------|-----------|
| CoP@Ni/Fe-P                                                         | CC        | 10                                            | 125                                        | 109.92                                 | This work |
| Ti@Ni(OH) <sub>2</sub> -<br>NiMoS                                   | Ti mesh   | 10                                            | 180                                        | 81                                     | 2         |
| Cu-(a-NiSe <sub>x</sub> /c-<br>NiSe <sub>2</sub> )/TiO <sub>2</sub> | CC        | 10                                            | 156.9                                      | 51.2                                   | 3         |
| MoS <sub>x</sub> -<br>20@rGO/CNTs                                   | /         | 10                                            | 179                                        | 78.1                                   | 4         |
| A-RuS <sub>2</sub>                                                  | CFP       | 10                                            | 141                                        | 65.6                                   | 5         |
| EDTA-<br>CoCoPBA-1                                                  | /         | 10                                            | 173                                        | 69.5                                   | 6         |

Table S4. Electrocatalytic parameters for OER performance of the CoP@Ni/Fe-P and as-prepared contrast electrocatalysts in 1 M KOH electrolyte.

| Catalyst         | Current density<br>[mA cm <sup>-2</sup> ] | Overpotential<br>[mV] | Tafel slope<br>[mV dec <sup>-1</sup> ] |
|------------------|-------------------------------------------|-----------------------|----------------------------------------|
| CoP              | 10/50/100                                 | 315/439/548           | 156.26                                 |
| Ni/Fe-P          | 10/50/100                                 | 284/373/463           | 80.06                                  |
| CoP@Ni/Fe-P      | 10/50/100                                 | 250/335/411           | 41.47                                  |
| RuO <sub>2</sub> | 10/50/100                                 | 320/404/482           | 62.88                                  |
| CoP@Fe-P         | 10/50/100                                 | 267/363/453           | 78.17                                  |
| CoP@Ni/Fe-P-c    | 10/50/100                                 | 267/375/487           | 79.69                                  |
| CoP@Ni/Fe-P-a    | 10/50/100                                 | 299/389/475           | 125.96                                 |



Table S5. Electrocatalytic parameters for OER performance of the CoP@ Ni/Fe-P and previously reported electrocatalysts in 1 M KOH electrolyte.

| Catalyst                                                        | Substrate | Current density<br>$j$ (mA cm <sup>-2</sup> ) | Overpotential at corresponding<br>$E$ (mV) | Tafel slope (mV dec <sup>-1</sup> ) | Ref.      |
|-----------------------------------------------------------------|-----------|-----------------------------------------------|--------------------------------------------|-------------------------------------|-----------|
| CoP@Ni/Fe-P                                                     | CC        | 10                                            | 250                                        | 35.33                               | This work |
| Cu-(a-NiSe <sub>x</sub> /c-NiSe <sub>2</sub> )/TiO <sub>2</sub> | CC        | 10                                            | 339                                        | 54.2                                | 3         |
| F-Co <sub>2</sub> B                                             | CC        | 10                                            | 320                                        | 32                                  | 7         |
| Ru-H <sub>2</sub> O/CC-350                                      | CC        | 10                                            | 270                                        | 63                                  | 8         |
| FePB/NiFeP                                                      | NF        | 10                                            | 182                                        | 43.9                                | 9         |
| Ni-B <sub>7</sub> /meso-Ir                                      | /         | 10                                            | 250                                        | 54.8                                | 10        |

## References

- 1.S. Anantharaj and S. Kundu, *ACS Energy Letters*, 2019, **4**, 1260-1264.
- 2.C. Yang, L. Zhou, T. Yan, Y. Bian, Y. Hu, C. Wang, Y. Zhang, Y. Shi, D. Wang, Y. J. J. o. C. Zhen and I. Science, 2022, **606**, 1004-1013.
- 3.K. R. Park, D. T. Tran, T. T. Nguyen, N. H. Kim and J. H. Lee, *Chemical Engineering Journal*, 2021, **422**.
- 4.Y. Guo, R. Wang, X. Xu, Y. Shang and B. Gao, *Electrochimica Acta*, 2018, **273**, 402-411.
- 5.Y. Xia, W. Wu, H. Wang, S. Rao, F. Zhang and G. Zou, *Nanotechnology*, 2020, **31**, 145401.
- 6.J. Y. Xie, H. J. Liu, Y. N. Zhen, Y. W. Dong, R. N. Luan, N. Yu, D. P. Liu, Y. M. Chai and B. Dong, *J Colloid Interface Sci*, 2022, **614**, 84-91.
- 7.H. Han, H. Choi, S. Mhin, Y.-R. Hong, K. M. Kim, J. Kwon, G. Ali, K. Y. Chung, M. Je, H. N. Umh, D.-H. Lim, K. Davey, S.-Z. Qiao, U. Paik and T. Song, *Energy & Environmental Science*, 2019, **12**, 2443-2454.
- 8.M. You, X. Du, X. Hou, Z. Wang, Y. Zhou, H. Ji, L. Zhang, Z. Zhang, S. Yi and D. Chen, *Applied Catalysis B: Environmental*, 2022, **317**.
- 9.X. Zhang, Y. Li, Z. Wu, H. Sheng, Y. Hu, C. Li, H. Li, L. Cao and B. Dong, *Materials Today Energy*, 2022, **26**.
- 10.Y. Kang, B. Jiang, V. Malgras, Y. Guo, O. Cretu, K. Kimoto, A. Ashok, Z. Wan, H. Li, Y. Sugahara, Y. Yamauchi and T. Asahi, *Small Methods*, 2021, **5**, e2100679.
